# Supplementary material for: AMPK activation improves recovery from pneumonia-induced lung injury via reduction of er-stress and apoptosis in alveolar epithelial cells
Source: Springer Nature journal article supplement (doi:10.1186/s12931-023-02483-6), 2023-07-12
Supplement: MOESM1 [file 12931_2023_2483_MOESM1_ESM.pdf]

## Supplementary Figure 1

Control

PAK 24 h

PAK 48 h

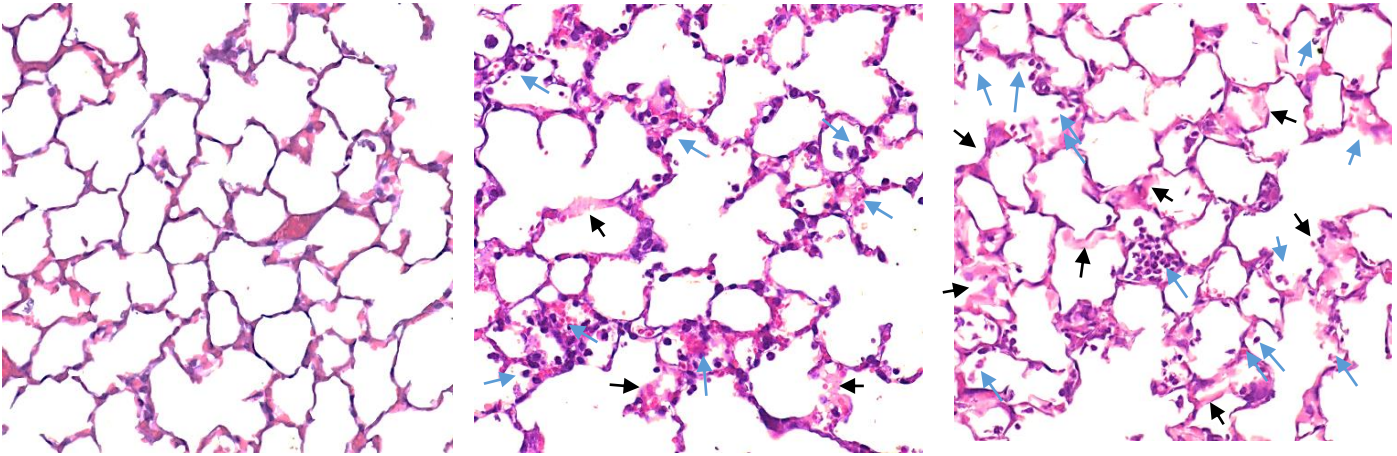

PAK 72 h

PAK 96 h

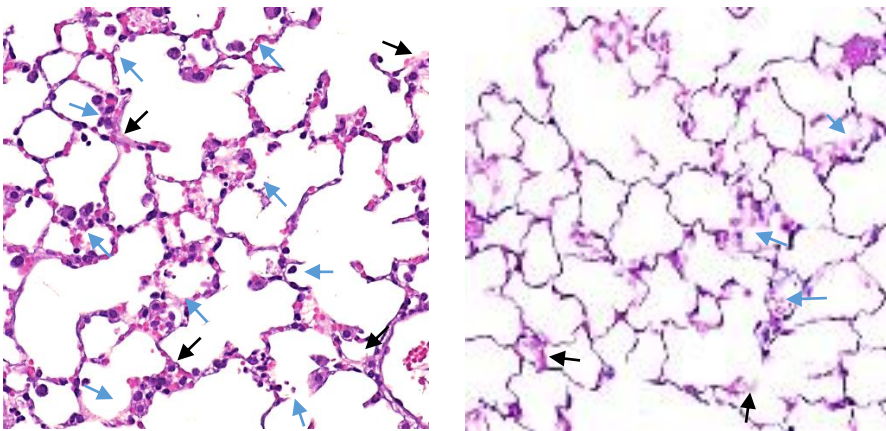

**Supplementary Figure 1. AMPK activation improved recovery from *P. aeruginosa*-induced lung injury.** (a) Representative images depicted lung sections (H&E) from control and groups of mice exposed to PAK for 0 (control), 24, 28, 72 and 96 hours. Arrows (blue) showed neutrophil flux and accumulation of cellular debris, as well as thickened septum (black arrows).

Supplementary Fig. 2

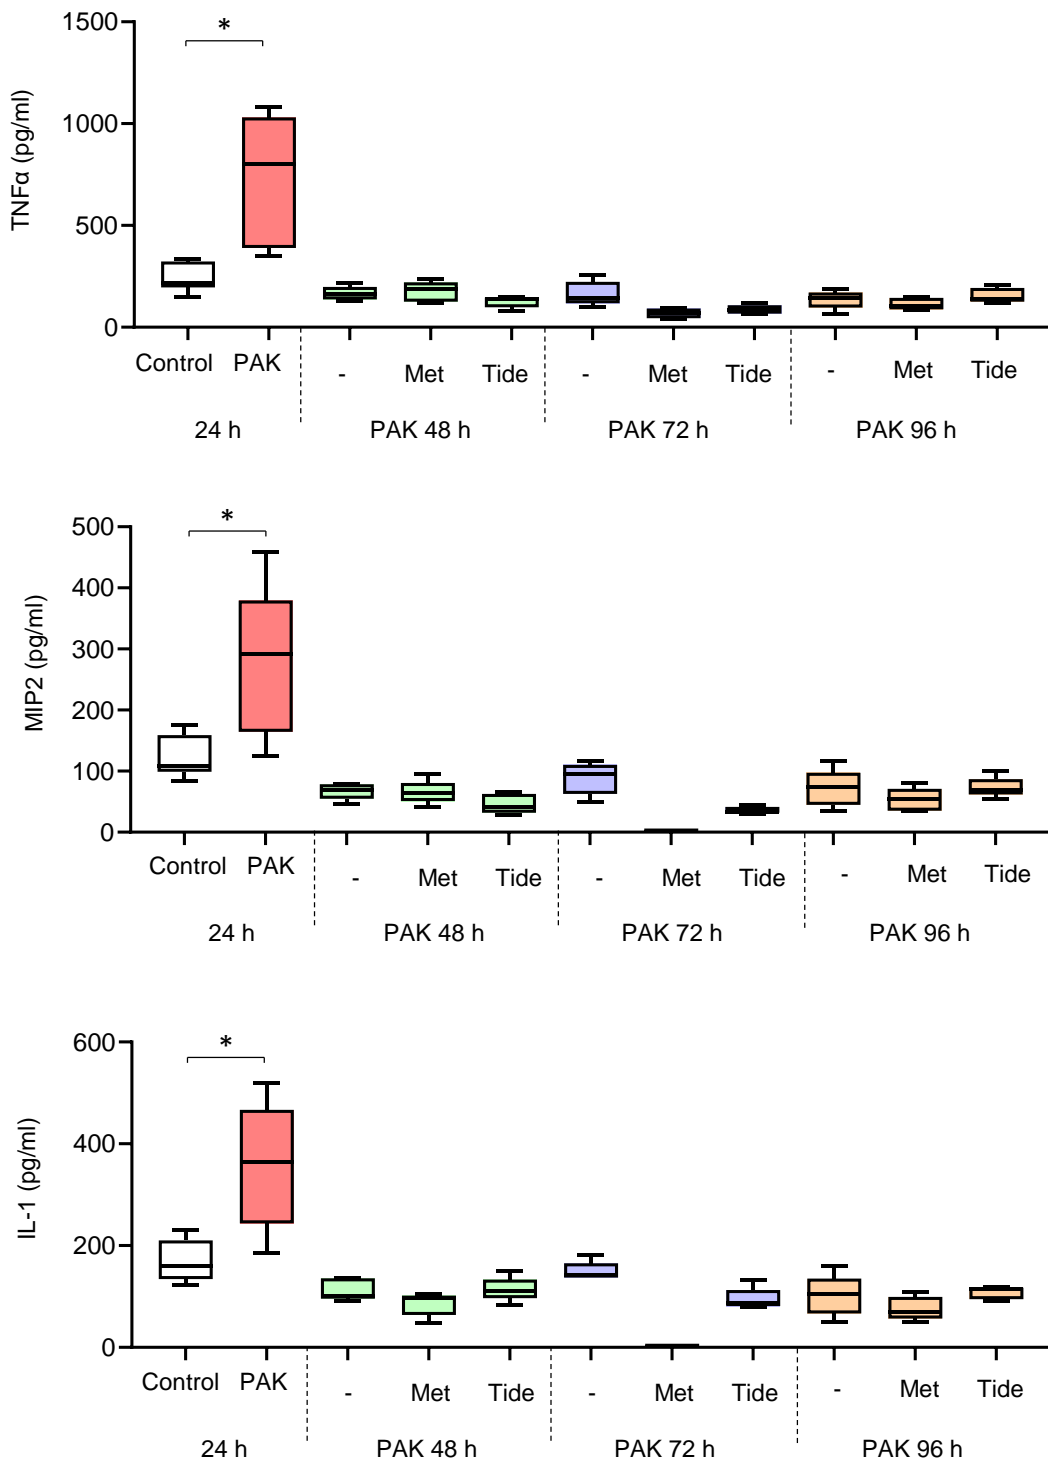

**Supplementary Fig. 2.** The amounts of TNF- $\alpha$ , MIP2 and IL-1 in BAL fluids from control, PAK or PAK and metformin or Tideglusib-treated mice. Data presented as Box plot, mean  $\pm$  s.d. from  $n = 5$  mice/ group. \* $P < 0.05$  (ANOVA)
